# Supplementary material for: Characteristics Of Superplastically Formed Ti-6242 Sheet
Source: Hindawi journal article supplement (doi:10.1155/2022/6951885), 1992-03-01
Supplement: f1 [file 6951885.f1.pdf]

## Supplementary materials

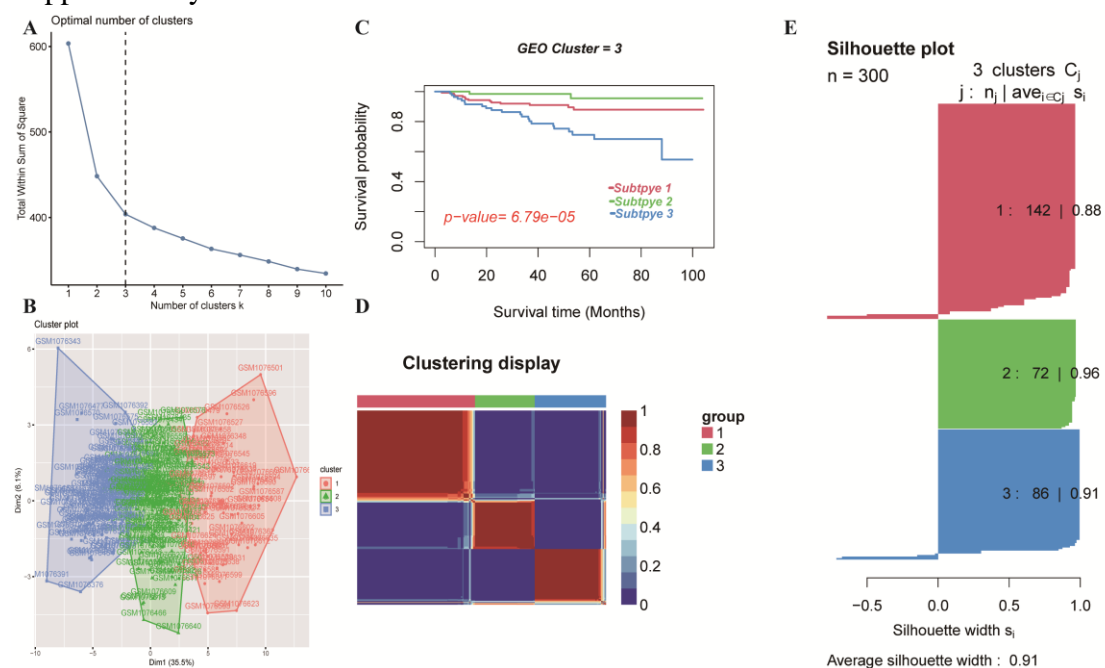

**Figure S1.** Identification of clinically relevant subtypes of cervical cancer in GEO database. (A) The optimal number of clusters ( $K$ ). (B) The cluster plot of 3 subtypes. (C) Kaplan-Meier plot of the three clusters. (D) The correlation heatmap of 3 subtypes. (E) Silhouette plot of three subtypes.

**Table S1.** The screened gene sets after univariable cox regression analysis.

| Gene sets and pathways                                                   | HR           | ln(HR) | HR 95% CL_L | ln(HR 95% CL_L) | HR 95% CL_U  | ln(HR 95% CL_U) | p-value |
|--------------------------------------------------------------------------|--------------|--------|-------------|-----------------|--------------|-----------------|---------|
| T_GSE36888_UNTREATED_VS_IL2_TREATED_S<br>TAT5_AB_KNOCKIN_TC<br>ELL_2H_UP | 3297.75<br>4 | 8.100  | 8.683       | 2.161           | 1252518      | 14.041          | 0.0075  |
| N_HALLMARK_ANGIOGENESIS                                                  | 665.258      | 6.500  | 17.521      | 2.863           | 25258.5<br>9 | 10.137          | 0.00046 |
| N_HALLMARK_EPITHELIAL_MESENCHYMAL_TRANSITION                             | 43.790       | 3.779  | 2.516       | 0.923           | 762.245      | 6.636           | 0.0095  |
